# Supplementary material for: Chiral channel-like cavity which is tunable via changes in 21-column packing structure
Source: Royal Society of Chemistry journal article supplement (doi:10.1039/b705641a), 2007-01-01
Supplement: b705641a.pdf [file b705641a.pdf]

ELECTRONIC SUPPLEMENTARY INFORMATION

Chiral Channel-like Cavity which is Tunable via Changes in  
 $2_1$ -Column Packing Structure

Yoshitane Imai,<sup>a,\*</sup> Kakuhiro Kawaguchi,<sup>a</sup> Katuzo Asai,<sup>a</sup> Tomohiro Sato,<sup>b</sup> Reiko Kuroda<sup>b,c,\*</sup>  
and Yoshio Matsubara<sup>a,\*</sup>

<sup>a</sup> Department of Applied Chemistry, Faculty of Science and Engineering,  
Kinki University, 3-4-1 Kowakae, Higashi-Osaka 577-8502, Japan.

<sup>b</sup> JST ERATO-SORST Kuroda Chir morphology Team, 4-7-6, Komaba, Meguro-ku,  
Tokyo, 153-0041, Japan.

<sup>c</sup> Department of Life Sciences, Graduate School of Arts and Sciences, The University of  
Tokyo, 3-8-1 Komaba, Meguro-ku, Tokyo, 153-8902, Japan.

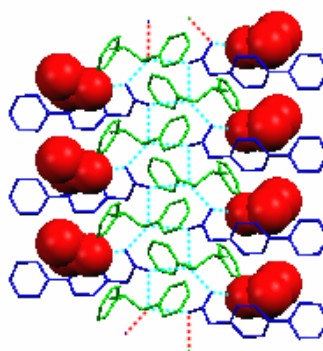

Complex III

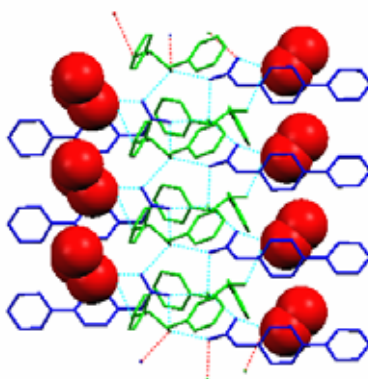

Complex IV

**Fig. SI-1** The  $2_1$ -columnar hydrogen- and ionic-bonded network of complexes III and IV. EtOH and *n*-PrOH are shown as red space-filling molecules.

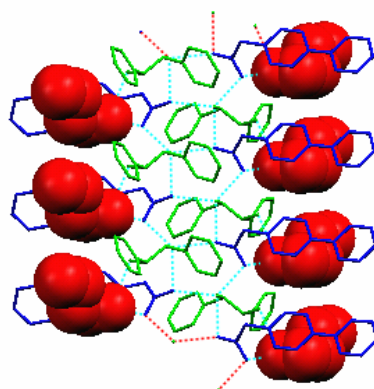

**Fig. SI-2** The  $2_1$ -columnar hydrogen- and ionic-bonded network of complex **V**. *n*-BuOH are shown as red space-filling molecules.

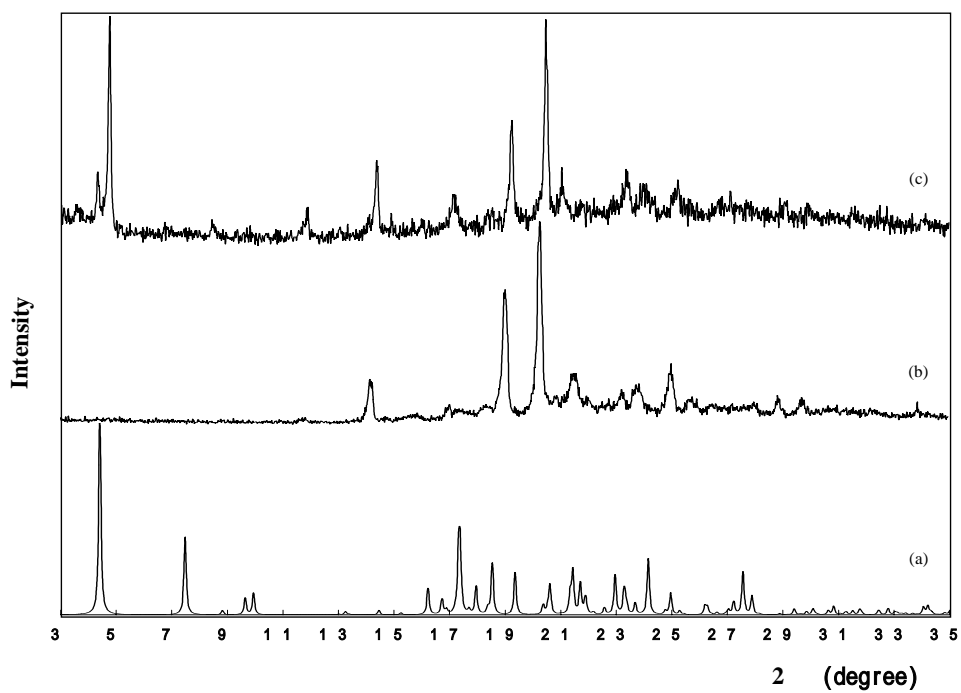

**Fig. SI-3** Change of X-ray powder diffraction patterns of complex **V**. (a) Complex **V**. (b) Complex **V-1**, obtained under air condition. (c) Complex **V-2**, obtained under *n*-BuOH vapor condition.
